# Supplementary material
Source: PubMed Central journal article supplement (PMC7414096)
Supplement: pnas.2007667117.sapp.pdf [file pnas.2007667117.sapp.pdf]

# Site-Specific Ubiquitination of Pathogenic Huntingtin Attenuates its Deleterious Effects

Vicky Hakim-Eshed<sup>\*1,2</sup>, Ayub Boulos<sup>\*1, 2</sup>, Chen Cohen-Rosenzweig<sup>\*1,3</sup>,  
Libo Yu-Taeger<sup>7</sup>, Tamar Ziv<sup>4</sup>, Yong Tae Kwon<sup>5</sup>, Olaf Riess<sup>6</sup>,  
Hoa Huu Phuc Nguyen<sup>7</sup>, Noam E. Ziv<sup>†1, 2</sup>  
and  
Aaron Ciechanover<sup>†1,3</sup>

## Supplementary Information:

- Supplementary Materials and Methods
- Supplementary Figures S1 to S6
- Supplementary Tables S1 to S3

## **Supplementary Information.**

### **Materials and methods:**

**Cell lines and culture conditions:** HEK293 cells were grown at 37°C and 5% CO<sub>2</sub> in DMEM (Biological Industries, Bet HaEmek, Israel) supplemented with 10% FBS (Gibco), sodium pyruvate (1 mM; Biological Industries), L-glutamine (2 mM; Biological Industries), and penicillin/streptomycin ((100 U/ml)/(0.1 mg/ml); Biological Industries). SH-SY5Y cells were grown at 37°C and 5% CO<sub>2</sub> in a 1:1 mixture of ATCC-formulated EMEM and F12 Nutrient Mixture, supplemented with 20% FBS, sodium pyruvate (1 mM), L-glutamine (2 mM), and penicillin/streptomycin ((100 U/ml)/(0.1 mg/ml)).

**Ethics:** All experiments were approved by the local ethics committee at Regierungspraesidium Tuebingen (approval ID: HG11/12), and by the "Technion-Israel Institute of Technology Committee for the Supervision of Animal Experiments" (ethics approval number IL-151-00-32). All animal-related experiments were carried out in accordance with the German Animal Welfare Act and the guidelines of the Federation of European Laboratory Animal Science Associations, based on European Union legislation (Directive 2010/63/EU).

**DNA constructs:** The DNA constructs used to express Htt17Q:EGFP and Htt134Q:EGFP were generated as follows: Large scale gene synthesis was used to synthesize the first exon of the *HTT* gene containing either 17 or 134 CAG repeats, fused to EGFP and flanked by AgeI (5') and BsrGI (3'). This segment was inserted into FUGWm upstream to EGFP, using the AgeI and BsrGI sites, to create FU-Htt17Q:EGFP-Wm (encoded protein is designated as 'Htt17Q') and FU-Htt134Q:EGFP-Wm (encoded protein is designated as 'Htt134Q'). All cloning and gene syntheses were carried out by GenScript (Piscataway NJ, USA). Lys 6 and Lys 9 in FU-Htt134Q:EGFP-Wm were replaced by Arg residues to create FU-Htt134Qm:EGFP-Wm (m stands for mutated; see *Site-directed mutagenesis* below; encoded protein is designated as 'Htt134Qm'). All DNA constructs were introduced into neurons using 3<sup>rd</sup> generation a Lentiviral expression vector based on the FUGWm backbone (43), and into cultured cell lines using standard transfection reagents (see under *Lentivirus production and transduction* and *Cell transfection* below).

**Site directed mutagenesis:** FU-Htt134Q:EGFP-Wm was used as template for site directed mutagenesis to substitute Lys residues 6 and 9 with Arg. Mutagenesis was performed using the appropriate oligonucleotides and the QuickChange II XL-Site directed mutagenesis kit (Agilent Technologies) according to the manufacturer's instructions.

**Lentivirus production and transduction:** Lentiviral particles were produced by transfecting HEK293T cells with a mixture of three packaging plasmids: pLP1, pLP2, and pLP\VSVG (packaging vector mix of the ViraPower four-plasmid Lentiviral expression system; Invitrogen), and the appropriate expression vector (either FU-Htt17Q:EGFP-Wm, FU-Htt134Q:EGFP-Wm, or FU-Htt134Qm:EGFP-Wm). HEK293T cell transfection was performed using Lipofectamine 2000 (Invitrogen) in 10 cm plates in cells that had reached 80% confluence. Supernatant was collected after 48 hours, passed through 0.45  $\mu$ m filters, aliquoted, and stored at -80°C. Transduction of cortical neuronal cultures was performed at 14 days *in vitro* (DIV), by adding different amounts of the filtered supernatant to each dish as determined real time PCR analysis (Fig S6A).

**Cell transfection:** Cultured cell lines were transfected with either FU-Htt17Q:EGFP-Wm, FU-Htt134Q:EGFP-Wm, or FU-Htt134Qm:EGFP-Wm. HEK293 cells were transfected using CalFectin transfection reagent (Bio Consult), and SH-SY5Y cells were transfected using Lipofectamine 3000 (ThermoFisher). Transfections were carried out with equal amounts of DNA (which resulted in similar expression levels; Fig. S6B), according to the manufacturers' instructions.

**Real Time PCR:** (i) RNA extraction - cortical neurons were plated on a 6 well plate ( $2 \times 10^6$  cells per well), and kept to develop for 14 days. At DIV 14, an equal amount of FU-Htt134Q:EGFP-Wm or FU-Htt134Qm:EGFP-Wm viral particles was added to each well for periods of 24 and 48 hours. RNA was extracted from each well by using NucleoSpin® RNA kit (Macherey-Nagel). (ii) cDNA preparation – 1  $\mu$ g RNA was used to prepare 1  $\mu$ g of cDNA by using RevertAID H minus First Strand cDNA Synthesis Kit (ThermoFisher) according to the manufacturer's instructions with random hexamer as primers. (iii) RT PCR - TaqMan® fast universal PCR master mix (Applied Biosystems) was used. Each reaction was carried out in triplicates using Taqman primers for EGFP gene (Applied Biosystems). HPRT gene was used as a control (Applied Biosystems). StepOnePlus™ Real Time PCR System apparatus (Applied Biosystems) was used with a comparative  $C_T$  ( $\Delta\Delta C_T$ ) platform.

40 cycles of amplification were used. The results were analyzed using StepOne™ software v2.3.

**Proteomic profile of HEK293 cells overexpressing Htt proteins:** HEK293 cells grown on 10 cm plates were transfected (in triplicates) with 3 µg cDNA coding for either FU-Htt17Q:EGFP-Wm, FU-Htt134Q:EGFP-Wm or FU-Htt134Qm:EGFP-Wm. Four days after transfection, cells were counted and  $20 \times 10^6$  cells from each triplicate were pelleted by centrifugation (300 x g, 5 min, 4°C), washed twice with PBS, and the pellet was frozen by liquid N<sub>2</sub> and stored at -80°C. The cellular proteomes were analyzed in two different methods: (i) Sequential lysis – from each pellet, soluble and insoluble fractions were prepared. (a) Soluble material extraction – cell pellet was incubated for 30 min at 4°C in lysis buffer (50 mM Tris-HCl pH 8.8, 100 mM NaCl, 5 mM MgCl<sub>2</sub>, 0.5% (w/v) Nonident P-40 (NP-40), 1 mM EDTA, and 1:100 protease inhibitor cocktail; Roche). Soluble material was removed by centrifugation for 5 min at 14,000 RPM at 4°C. (b) Insoluble material extraction - the pellet containing the insoluble material was resuspended in 300 µl DNase I buffer (20 mM Tris-HCl, pH 8.0, 15 mM MgCl<sub>2</sub>, and DNase I (Boehringer Mannheim) at a final concentration of 0.5 mg/ml), and incubated for 1 hour at 37°C. After DNA digestion, the samples were centrifuged for 5 min at 13,300 RPM at room temperature. The supernatant was removed, and the remaining pellet was resuspended in a buffer containing 100 mM Tris-HCl pH 7.9 and 10% SDS, followed by boiling at 95°C for 5 min, and labeled as '10% SDS fraction'. Under these conditions, the entire pellet was solubilized. (ii) Gel analysis – each pellet was resuspended in a lysis buffer containing 100 mM Tris-HCl pH 7.9 and 10% SDS, followed by one cycle of sonication (using a probe) for 30 seconds, and boiling at 95°C for 10 min (until the entire pellet was solubilized). Protein concentration was determined by the BCA protein assay (ThermoFisher), and 50 µg protein were resolved by SDS-PAGE (10%). Insoluble material was extracted from the stacking gel and the soluble material was extracted from the resolving gel.

**Proteolysis and MS analysis of soluble and insoluble fractions:** The proteins from the different fractions were precipitated in 80% acetone, washed, and the protein pellets were resuspended in 9 M Urea, 400 mM ABC and 10 mM DTT, with a cycle of sonication. Proteins quantities were determined by a Bradford Test. 20 µg protein from each sample were reduced with 3 mM DTT (60°C for 30 min),

modified with 12 mM IAA in 400 mM ABC (in the dark, room temperature for 30 min) and digested in 1 M Urea, and 50 mM ABC with modified trypsin (Promega) at a 1:50 enzyme-to-substrate ratio (overnight at 37°C). An additional second trypsinization was carried out for 4 hours. The tryptic peptides were desalted using C18 tips (Top tip, Glygen), dried and re-suspended in 0.1% Formic acid. 1 µg peptides from each fraction were resolved by reverse-phase chromatography on 0.075 X 180 mm fused silica capillaries packed with Reprosil reversed phase material. The peptides were eluted with linear 60 minutes gradient of 5 to 28%, 15 minutes gradient of 28 to 95%, and 25 minutes at 95% acetonitrile, with 0.1% formic acid in water at flow rates of 0.15 µl/min. MS was performed by Q Exactive HFX mass spectrometer (ThermoFisher) in a positive mode using repetitively full MS scan followed by collision-induced dissociation (HCD) of the 18 most dominant ions selected from the first MS scan. The MS data from three biological repeats was analyzed using the MaxQuant software 1.5.2.8 (Mathias Mann's group) vs. the human proteome from the Uniprot database with 1% FDR. The data were quantified by label free analysis using the same software. Statistical analyses of the identification and quantization results were done using Perseus 1.6.10.43 software (Mathias Mann's group). Stringent criteria were used for the identification of proteins with increased or decreased abundance: (i) The minimum acceptable change was a factor of ~1.75. (ii)  $P \leq 0.05$ , T-test assuming unequal variance, for comparisons between cells expressing Htt134Q, Htt134Qm or Htt17Q.

**Proteolysis and MS analysis of gel-extracted proteins:** Following SDS-PAGE, proteins from the stacking gel, including the well, were reduced with 3 mM DTT (60°C for 30 min), modified with 10 mM IAA in 100 mM ABC (in the dark, room temperature for 30 min) and digested in 10% acetonitrile and 10 mM ABC with modified trypsin (Promega) at a 1:10 enzyme-to-substrate ratio (overnight at 37°C). The resulting peptides were desalted using C18 tips (Homemade stage tips), dried and re-suspended in 0.1% Formic acid. The resolving part of the gel was sliced to 2 (in the middle), and the proteins were trypsinized as described for the stacking gel. MS and data analyses were carried out done similar to the methodology that is described above.

**Imaging data analysis:** All imaging data analyses were performed using custom written software ('OpenView') which includes features for automated/manual tracking of individual aggregates and measurements of fluorescent intensities over

time (described in detail in (41)) (i) Aggregates appearance calculation - aggregates appearance was measured by the time the first 5 aggregates were detected for each Lentiviral vector; (ii) Measurement of aggregates intensities - areas were placed programmatically at each time step using identical parameters on the centers of fluorescent aggregates, and mean pixel intensities within these areas were obtained from maximal intensity projections of Z section stacks. (iii) Aggregate formation rates - individual aggregates were identified and tracked semi-automatically. Areas were placed initially over all aggregates and then a smaller subset was tracked backward in time.

**Western blot analyses:** (i) Htt134Q:EGFP and Htt134Qm:EGFP expression level - HEK293 cells were grown and lysed as described under *Proteomic profile of HEK293 cells overexpressing Htt proteins* (in the sub-section *gel analysis*). Protein concentration was determined by the BCA protein assay (ThermoFisher), and 35 µg protein were resolved by SDS-PAGE (10%) and transferred to nitrocellulose membrane (0.2 µm; Bio-Rad). (ii) Dot blot - HEK293 cells were grown and lysed as described under *Proteomic profile of HEK293 cells overexpressing Htt proteins* (in the sub-section *sequential lysis*). Aliquots corresponding to 2.5%, 5%, and 10% of the 10% SDS fraction were diluted into 200 µl 10% SDS in PBS. The samples were then filtered on a BRL dot-blot filtration device through a cellulose acetate membrane (Schleicher and Schuell, Keene, NH, USA, 0.2 µm pore size) that was pre-equilibrated with TBS (20 mM Tris-HCl, pH 7.6, 150 mM NaCl) and 2% SDS. The membrane was then washed twice with 200 µl TBS and 0.1% SDS. All membranes were blocked for 1 hour in TBST (50 mM Tris-HCl, pH 7.5, 150 mM NaCl, and 0.1% Tween20) with 5% non-fat dried milk. Staining was performed using anti-Htt (H7540, Sigma, 1:1000) and anti-Vinculin (V9131, Sigma, 1:1000) or anti-EGFP (2955S, Cell signaling, 1:1000) and anti-tubulin (T9026, Millipore, 1:10,000) as primary antibodies, and peroxidase-conjugated anti rabbit or mouse (as needed) (ImmunoResearch Laboratories, 1:10,000) as a secondary antibody. Enhanced chemiluminescence (ECL) (Pierce) was used for immune detection.

**Calculation of aggregates numbers per cell:** HEK293 cells were transfected with FU-Htt134Q:EGFP-Wm or FU-Htt134Qm:EGFP-Wm. One day following transfection, cells were counted by a Vi Cell XR cell counter (Beckman Coulter), and 7,500 cells were seeded in wells of a 96 well plate (µClear, Black, Greiner). Three days later, cells were supplemented with NucBlue® Live ReadyProbes

Reagent according to the manufacture's protocol (ThermoFisher) and scanned by ImageXpress® Micro Confocal system (Molecular Devices). Aggregates number per cell was determined by the MetaXpress software (Molecular Devices).

**Cell viability assays:** (i) Trypan Blue dye-exclusion method: HEK293 cells were transfected with either FU-Htt134Q:EGFP-Wm, or FU-Htt134Qm:EGFP-Wm. One day following transfection,  $2.5 \times 10^6$  cells were seeded on three 10 cm plates. Cells from each plate were collected together with the growth medium at days 3-5 following transfection. Cell counter was used to quantify live cells, based on the trypan blue-exclusion method. (ii) Propidium iodide (PI) incorporation: HEK293 and SH-SY5Y cells were transfected with either FU-Htt17Q:EGFP-Wm, FU-Htt134Q:EGFP-Wm, or FU-Htt134Qm:EGFP-Wm (non-transfected cells - 'NT' - were also grown and used as a control). One day following transfection, cells were counted and 7,500 cells were seeded in wells of a 96 well plate ( $\mu$ Clear, Black, Greiner). The percentage of dead cells was evaluated three days later using the ReadyProbes® Cell Viability Imaging Kit (Blue/Red) (ThermoFisher) according to the manufacturer's protocol. In short, 2 drops each of NucBlue® reagent and PI/1ml of cell growth medium were added. Cells were then scanned by ImageXpress® Micro Confocal system (Molecular Devices), and cell viability was determined by counting total (marked by NucBlue®) and dead (marked by PI) cells as measured by the MetaXpress software (Molecular Devices).

**Cell cycle analysis:** HEK293 cells were transfected with either FU-Htt17Q:EGFP-Wm, FU-Htt134Q:EGFP-Wm, or FU-Htt134Qm:EGFP-Wm. Two and four days after transfection, cells were counted and  $2 \times 10^6$  cells were pelleted by centrifugation (300 x g, 5 min, 4°C), washed once with PBS, and the pellet was resuspended in 1 ml cold PBS. The cells' suspension was added slowly into 4 ml cold ethanol (100%), vortexed thoroughly, and stored at -20°C for at least 15 min. Ethanol was removed by centrifugation (300 x g, 5 min, 4°C). Cells were resuspended in 1 ml PBS, and left to rehydrate in room temperature for 15 min. The cells were then incubated for 30 min in 37°C with 10 mg/ml RNase A (Macherey-Nagel), followed by centrifugation (300 x g, 5 min, 4°C) and resuspension in 1 ml staining buffer (100 mM Tris-HCl, pH 7.4, 150 mM NaCl, 1 mM CaCl<sub>2</sub>, 0.5 mM MgCl<sub>2</sub>, and 0.1% NP-40). Extracted cells' suspension was transferred to FACS tubes with cell strainer snap cap mesh. PI was added (at a final concentration of 0.05 mg/ml; Sigma) to each sample immediately before

FACS analysis, that was performed using High Throughput LSR Fortessa. Data were analyzed by the FCS Express 5 software.



A. (i) Htt134Q

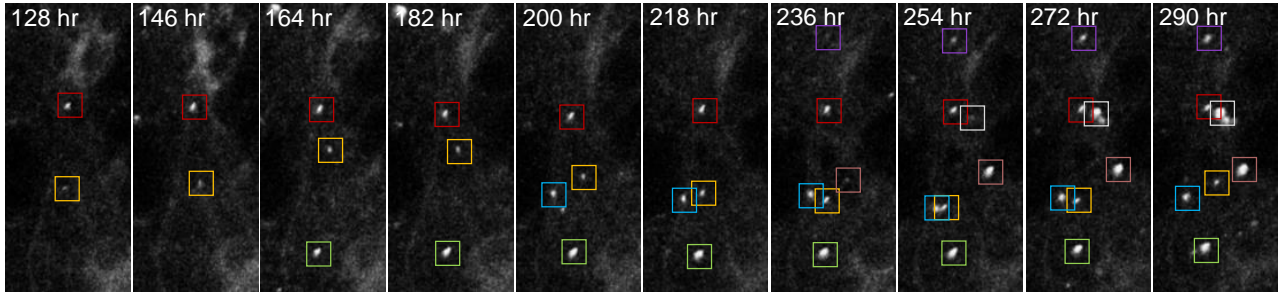

(ii) Htt134Qm

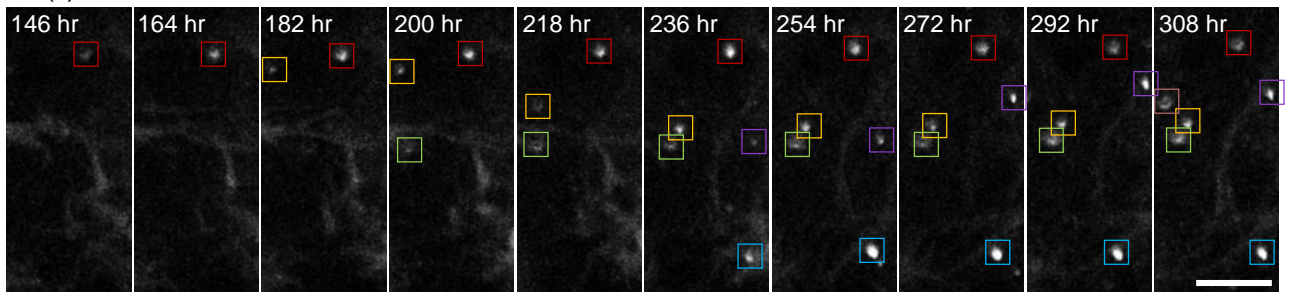

B. (i) Htt134Q

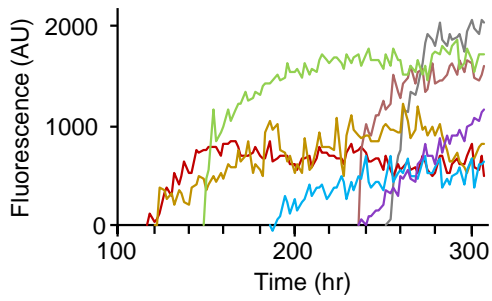

(ii) Htt134Qm

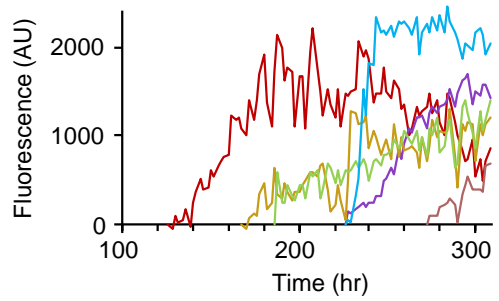

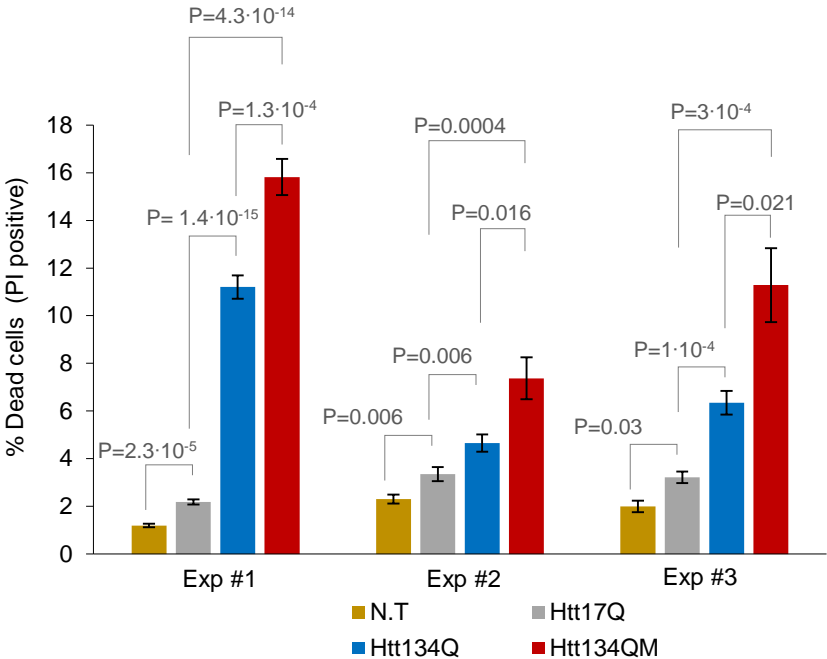

A. (i)

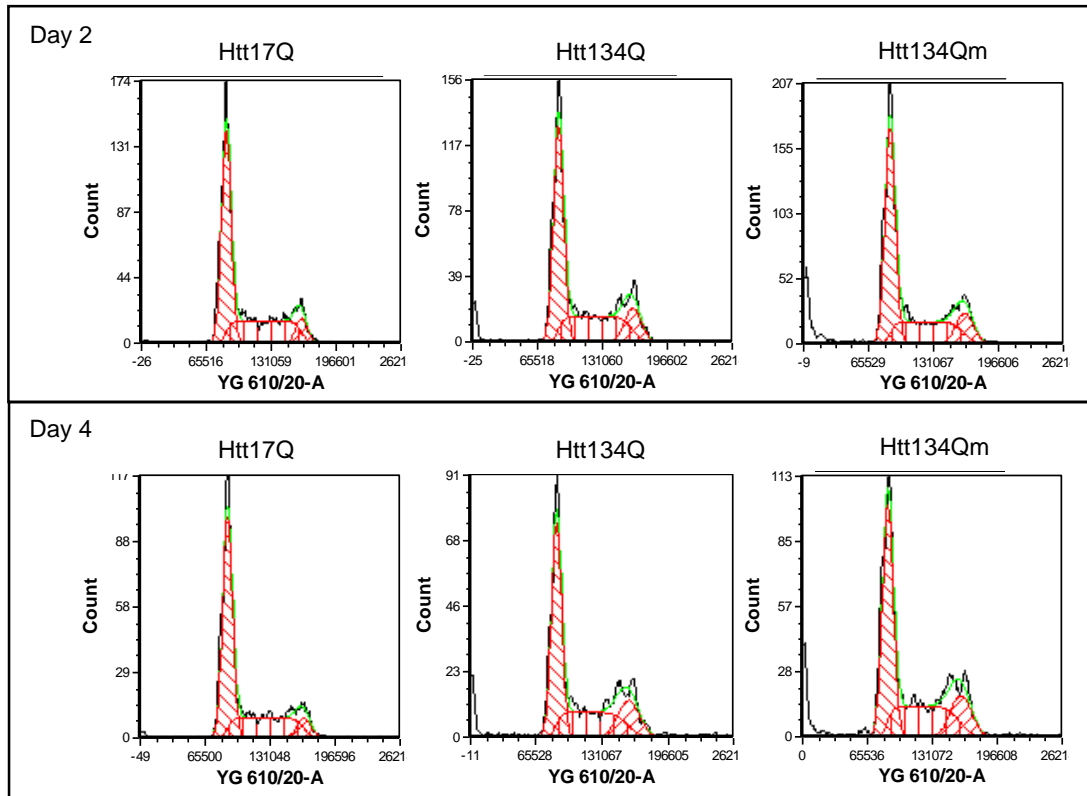

(ii)

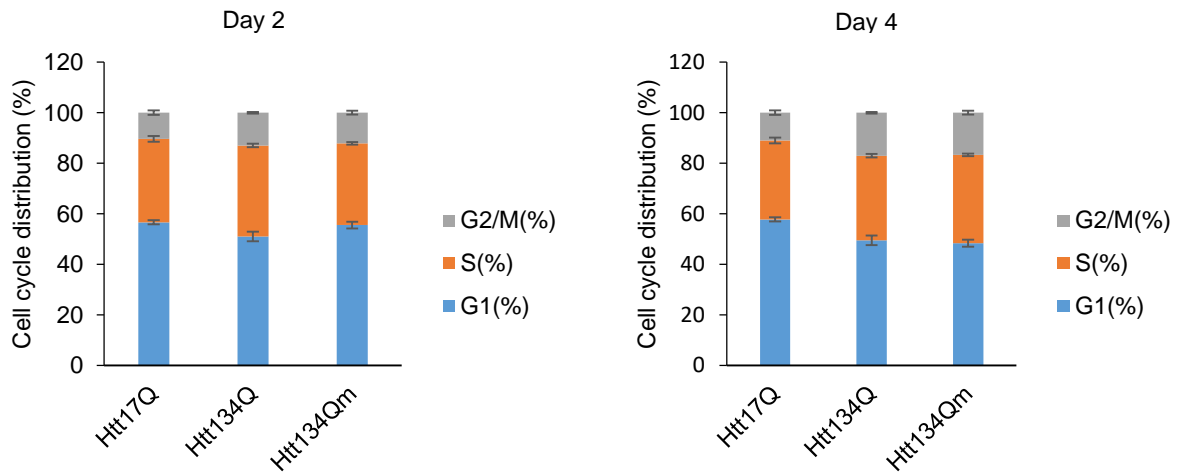

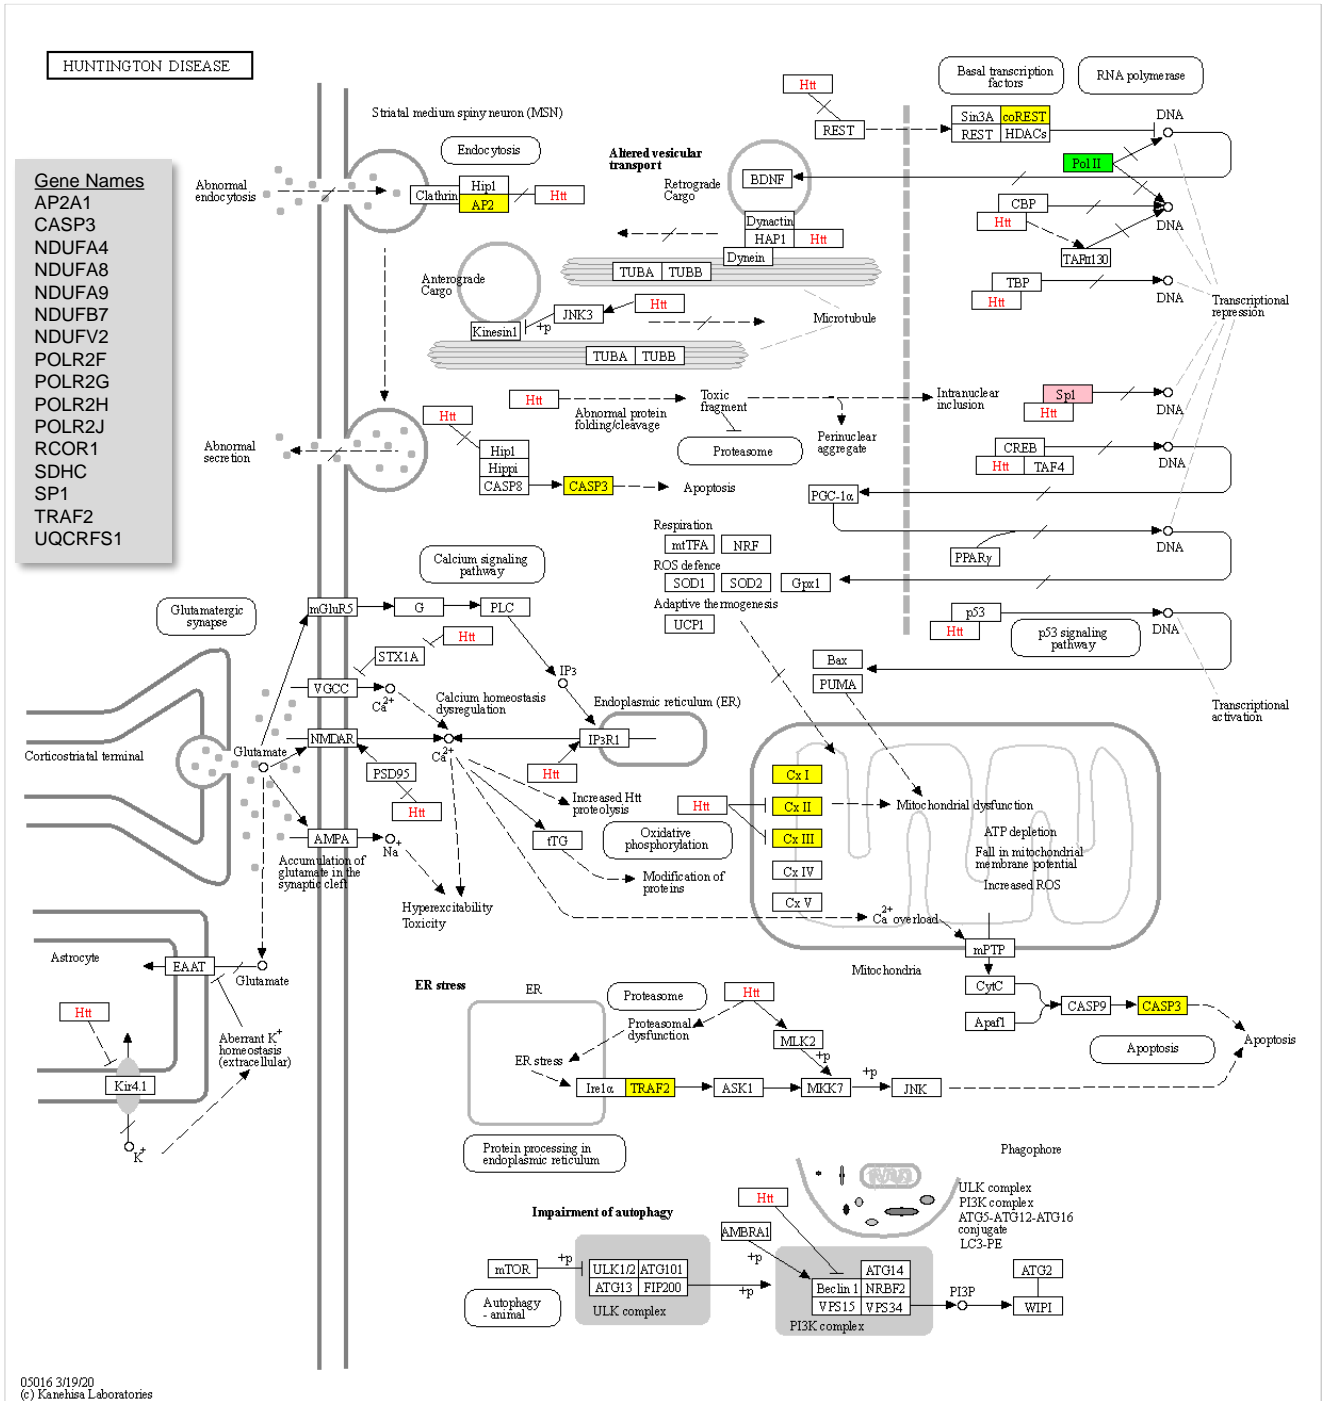

05016 3/19/20  
© Kanehisa Laboratories

- Htt134Q > Htt134Qm
- Htt134mQ > Htt134Q
- Subunits changed in both conditions

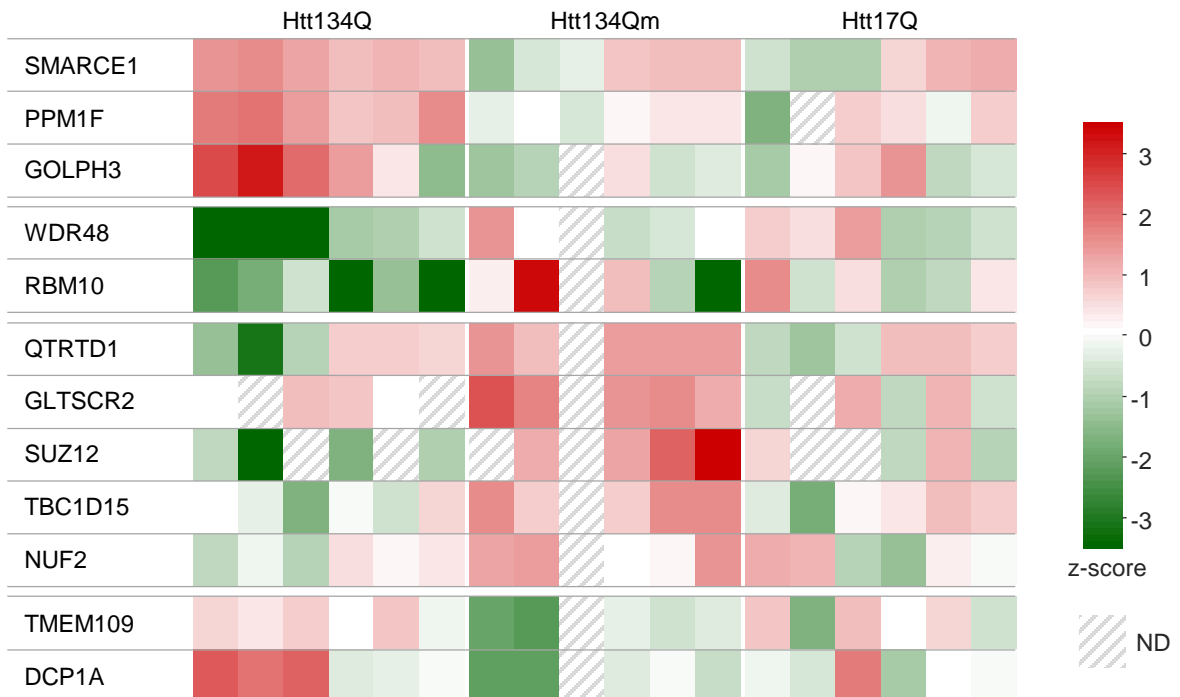

A. (i) 24 hours

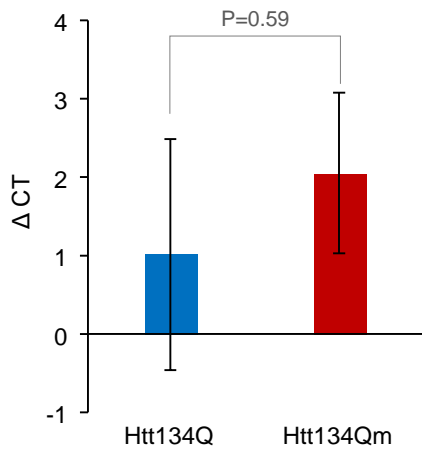

(ii) 48 hours

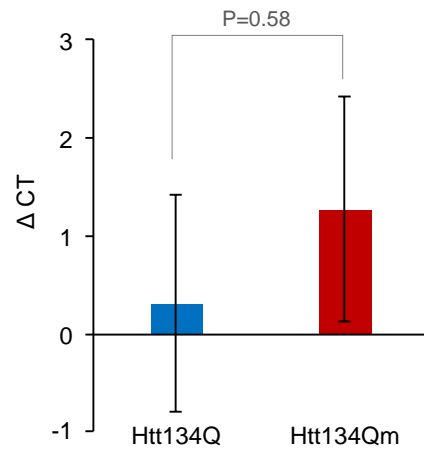

B. (i)

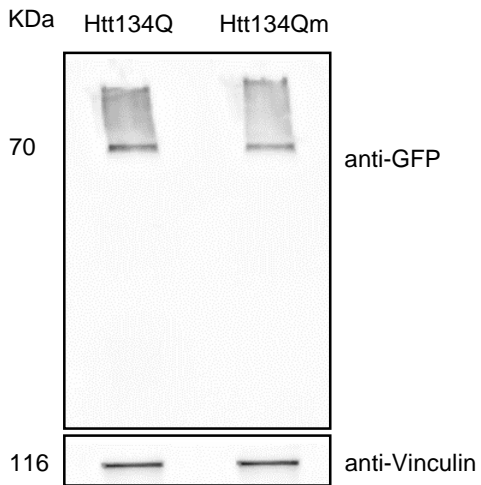

(ii)

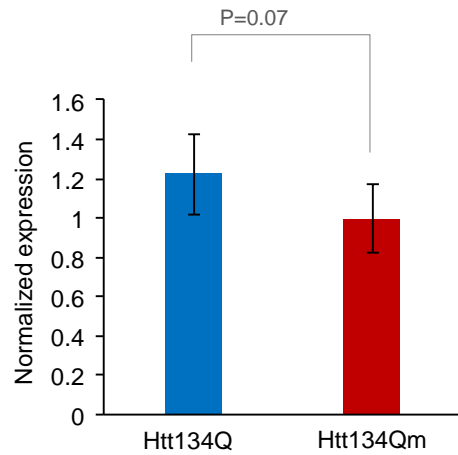

## Legends to SI Appendix Figures:

**Movies S1. Long term imaging of Htt134Q:EGFP and Htt134Qm:EGFP expressed in primary cultures of rat cortical cells.** Cultured cortical neurons were transduced with FU-Htt134Q:EGFP-Wm or FU-Htt134Qm:EGFP-Wm viral particles at DIV 14. Imaging was initiated at DIV 15, and was carried out by automated multisite time-lapse confocal microscopy, at 2-hours intervals (3 sections at each location), for a period of 2 weeks. **(A)** Htt134Q:EGFP **(B)** Htt134Qm:EGFP.

**Fig. S1. Htt134Q:EGFP ubiquitination does not affect aggregate formation rates.** Cortical neurons in culture were transduced with FU-Htt134Q:EGFP-Wm or FU-Htt134Qm:EGFP-Wm viral particles at DIV 14. Imaging was carried out as described under *Movies S1*. **(A)** Individual aggregates were identified and tracked semi-automatically. (i) Htt134Q:EGFP; (ii) Htt134Qm:EGFP. **(B)** Time course of aggregates' formation for the aggregates shown in (A) of Htt134Q:EGFP (i) and Htt134Qm:EGFP (ii). Curves color coded according to colored boxes in A. Times indicate hours from transduction. Bar, 10 $\mu$ m.

**Fig. S2. Htt134Q:EGFP ubiquitination alleviates the pathological effects of polyQ expansion.** HEK293 cells were transfected with either FU-Htt17Q:EGFP-Wm, FU-Htt134Q:EGFP-Wm or FU-Htt134Qm:EGFP-Wm. Non-transfected (N.T.) cells were used as controls. Four days following transfection, the cells were treated with PI and NucBlue<sup>®</sup> and visualized using a high content imaging system (ImageXpress<sup>®</sup> Micro Confocal system). The percentage of dead cells was calculated as the number of PI-positive cells relative to NucBlue<sup>®</sup>-positive cells (25 fields of view per well, N.T: 60 wells, 17Q: 55 wells, 134Q: 59 wells and 134Qm: 50 wells, three independent experiments; Error bars = SEM; P values from two-tailed t-Tests assuming unequal variances are shown).

**Fig. S3. Htt134Q:EGFP ubiquitination does not affect cell division rates.** FACS analysis for cell cycle stage distribution of HEK293 cells overexpressing either FU-Htt17Q:EGFP-Wm, FU-Htt134Q:EGFP-Wm or FU-Htt134Qm:EGFP-Wm harvested two or four days following transfection. Cells were fixed and stained with PI (Sigma) and relative DNA content was analyzed using high throughput cell cytometry. (i) Representative histograms from each cell population from a single experiment; (ii) Quantification of cell cycle stage distributions (three independent experiments; Error bars = SEM).

**Fig. S4.** Differentially expressed proteins indicated on KEGG mapping of Huntington's disease. Proteins whose abundance was higher in cells expressing Htt134Q:EGFP are indicated in yellow; Proteins whose abundance was higher in cells expressing Htt134Qm:EGFP are indicated in pink; Subunit changes in both conditions are indicated in green.

**Fig. S5.** Heat map for 12 proteins whose abundance was selectively altered in cells expressing either Htt134Q:EGFP or Htt134Qm:EGFP (see also Table S3). Shown are data derived from six replicates from two separate experiments. Values are expressed as Z-scores according to the bar on the right. Samples in which a protein was not detected (ND) are marked as hatched rectangles.

**Fig. S6. Htt134Q:EGFP and Htt134Qm:EGFP have similar expression levels. (A, B)** Measurements of Htt134Q:EGFP and Htt134Qm:EGFP expression levels by RT-PCR and western blots. **(A)** RT-PCR analysis of cortical neurons transfected with FU-Htt134Q:EGFP-Wm or FU-Htt134Qm:EGFP-Wm 24 hours (i) or 48 hours post transfection (ii). GFP primers were used as the target primers and HPRT as the endogenous gene primers. **(B)** Western blot analysis of HEK293 cells transfected with FU-Htt134Q:EGFP-Wm or FU-Htt134Qm:EGFP-Wm four days post transfection, using a-GFP antibody (i) A representative blot from a single experiment. (ii) Quantification of data shown in (i) from three independent experiments. Error bars: SEM. P values from Two tailed paired t-Test assuming unequal variances are shown.



**Table S1. Up-regulated proteins: comparison between Htt134Q and 134Qm-overexpressing cells. Gel. (A) Htt134Q > Htt134Qm; (B) Htt134Qm > Htt134Q**

A.

| Gene name  | Protein ID | Fold change | Gene name   | Protein ID | Fold change |
|------------|------------|-------------|-------------|------------|-------------|
| MYBL2      | P10244     | 70.85       | RBM20       | Q5T481     | 2.12        |
| ZNF292     | J3KNV1     | 64.75       | MTIF3       | Q9H2K0     | 2.11        |
| NT5C       | J3KRC4     | 32.29       | WASF1       | Q92558     | 2.11        |
| MKRN2      | C9J494     | 26.56       | LIAS        | O43766     | 2.05        |
| FUNDC1     | Q8IVP5     | 25.37       | MRPL41      | Q8IXM3     | 2.04        |
| WDR87      | E7ESW6     | 23.90       | L2HGDH      | C9JVN9     | 2.04        |
| PITX2      | D6RFI4     | 21.74       | POLR2J      | P52435     | 2.04        |
| HIST1H4F   | J3KNC0     | 16.06       | FAM98C      | Q17RN3     | 2.01        |
| RAB39B     | Q96DA2     | 8.14        | SDHC        | Q99643     | 2.00        |
| SENP1      | Q9P0U3     | 7.79        | GBE1        | Q04446     | 2.00        |
| CYFIP2     | E7EVJ5     | 6.25        | TAMM41      | Q96BW9     | 1.99        |
| MAP2K4     | P45985     | 5.03        | COMMD3-BMI1 | R4GMX3     | 1.99        |
| HSPB11     | Q9Y547     | 4.95        | CRTAP       | O75718     | 1.98        |
| AACS       | Q86V21     | 2.97        | NDUFA9      | Q16795     | 1.98        |
| CTNNA1     | Q9UBT7     | 2.89        | RPL7L1      | Q6DKI1     | 1.98        |
| MOCS1      | Q9NZB8     | 2.88        | NDUFAF5     | Q5TEU4     | 1.97        |
| NEDD8-MDP1 | E9PL57     | 2.84        | SDR39U1     | Q9NRG7     | 1.96        |
| ALB        | A0A0C4DGB6 | 2.80        | LPGAT1      | Q92604     | 1.95        |
| GNA13      | Q14344     | 2.68        | SLC25A19    | Q9HC21     | 1.95        |
| PLSCR1     | C9J7K9     | 2.67        | GNPNAT1     | Q96EK6     | 1.94        |
| FAM177A1   | G3V583     | 2.65        | AK4         | P27144     | 1.93        |
| LMAN2L     | Q9H0V9     | 2.64        | RAB4A       | P20338     | 1.91        |
| HSD17B7    | P56937     | 2.63        | NSUN4       | Q96CB9     | 1.90        |
| GNPDA2     | Q8TDQ7     | 2.62        | DFFA        | O00273     | 1.89        |
| NME7       | Q9Y5B8     | 2.48        | SKA3        | Q8IX90     | 1.89        |
| NIP7       | Q9Y221     | 2.45        | C1QBP       | Q07021     | 1.89        |
| NDNL2      | Q96MG7     | 2.42        | BRI3BP      | Q8WY22     | 1.88        |
| TWF2       | Q6IBS0     | 2.42        | MTX2        | C9JAZ1     | 1.87        |
| DDB2       | Q92466     | 2.41        | THOC6       | Q86W42     | 1.87        |
| CDC34      | P49427     | 2.33        | PPCDC       | H3BRQ0     | 1.86        |
| B3GAT3     | G3V150     | 2.30        | ARGLU1      | Q9NWB6     | 1.86        |
| TMCO1      | Q9UM00     | 2.27        | GDPD1       | Q8N9F7     | 1.85        |
| RRP36      | Q96EU6     | 2.27        | TTI1        | O43156     | 1.85        |
| SPR        | P35270     | 2.27        | HSPBP1      | Q9NZL4     | 1.85        |
| SIX1       | Q15475     | 2.26        | TCEAL4      | Q96E15     | 1.84        |
| RFT1       | B5MDE0     | 2.26        | SNRPA1      | P09661     | 1.84        |
| GTF2E2     | P29084     | 2.25        | SFT2D3      | Q58719     | 1.84        |
| NDUFA8     | P51970     | 2.23        | RRP7A       | Q9Y3A4     | 1.83        |
| ARMC10     | Q8N2F6     | 2.23        | BANF1       | O75531     | 1.82        |
| REEP6      | Q96HR9     | 2.22        | UQCRFS1     | P47985     | 1.80        |
| TIMM17B    | O60830     | 2.21        | SORBS3      | H0YAZ3     | 1.79        |
| PRDX4      | Q13162     | 2.19        | FAHD2A      | Q96GK7     | 1.78        |
| SEC11A     | H0YNG3     | 2.19        | BRE         | Q9NXR7     | 1.77        |
| MRPS34     | C9JJ19     | 2.18        | FAM103A1    | A0A3B3IU46 | 1.76        |
| GFP        | CON_Q9U6Y5 | 2.18        | LRRCS9      | Q96AG4     | 1.75        |
| NDUFAF1    | H0YL22     | 2.17        | NIT1        | Q86X76     | 1.74        |
| HIST1H2AC  | Q93077     | 2.15        | JUN         | P05412     | 1.74        |
| GNB1L      | Q9BYB4     | 2.13        |             |            |             |

B.

| Gene name | Protein ID | Fold change | Gene name | Protein ID | Fold change |
|-----------|------------|-------------|-----------|------------|-------------|
| PIWIL3    | E9PIP6     | 82.97       | DLGAP5    | Q15398     | 2.95        |
| ANKLE2    | Q86XL3     | 81.42       | EML1      | F8W717     | 2.86        |
| CTDSP1    | H7C3E0     | 30.72       | FSIP2     | Q5CZC0     | 2.78        |
| GYG1      | C9JQ42     | 9.43        | ZNF768    | H3BS42     | 2.06        |
| GTSE1     | Q9NYZ3     | 4.26        | SMG7      | B1ALB4     | 2.02        |
| HIST1H1E  | P10412     | 3.27        | SP1       | P08047     | 1.94        |
| GTF2A2    | P52657     | 3.26        | ASNSD1    | L0R819     | 1.92        |

Table S2. Up-regulated proteins: comparison between Htt134Q and 134Qm-overexpressing cells. NP-40. (A) Htt134Q &gt; Htt134Qm; (B) Htt134Qm &gt; Htt134Q

A.

| Gene name | Protein ID | Fold change | Gene name   | Protein ID | Fold change | Gene name | Protein ID | Fold change |
|-----------|------------|-------------|-------------|------------|-------------|-----------|------------|-------------|
| CLN6      | A0A1B0GW73 | 284.10      | NUP133      | Q8WUM0     | 2.79        | AP1S1     | A0A2R8YGH5 | 1.96        |
| PAIP2     | Q9BPZ3     | 241.09      | HEBP1       | F5GWX2     | 2.77        | SPIN1     | Q9Y657     | 1.96        |
| RAD23A    | P54725     | 162.59      | ADNP        | Q9H2P0     | 2.76        | HSPA6     | P17066     | 1.96        |
| LARP4     | Q96J85     | 90.92       | COPS6       | E7EM64     | 2.72        | LSM2      | Q9Y333     | 1.96        |
| SLU7      | Q95391     | 85.72       | S100A10     | P60903     | 2.72        | WDR43     | Q15061     | 1.95        |
| CD276     | A0A0C4DGH0 | 83.33       | MDC1        | Q14676     | 2.71        | XPO1      | O14980     | 1.95        |
| PCGF6     | Q9BYE7     | 79.19       | DBI         | P07108     | 2.71        | WRAP53    | Q9BUR4     | 1.95        |
| POLA2     | Q14181     | 71.75       | PPM1F       | P49593     | 2.66        | SERPINB6  | A0A2R8YD12 | 1.95        |
| POLR1D    | P0DPP6     | 71.23       | SPRYD4      | Q8WW59     | 2.62        | RPRD1A    | Q96P16     | 1.94        |
| CENPV     | Q7Z7K6     | 69.25       | NUP35       | Q8NFH5     | 2.61        | PRMT1     | E9PKG1     | 1.94        |
| PCBP2     | Q15366     | 68.69       | ABHD10      | Q9NUJ1     | 2.61        | ATP5F1    | P24539     | 1.94        |
| RNPC3     | Q96LT9     | 58.14       | NDUFA4      | O00483     | 2.59        | PRRC1     | Q96M27     | 1.93        |
| DNAJC3    | X6R9L0     | 54.44       | TOMM22      | Q9NS69     | 2.55        | EIF2B2    | P49770     | 1.93        |
| FAM120A   | Q9NZB2     | 46.32       | NUP37       | Q8NFH4     | 2.55        | DTYMK     | P23919     | 1.93        |
| PI4K2A    | Q9BTU6     | 45.74       | TMED2       | E7EQ72     | 2.54        | GNA11     | A0A087WVZ3 | 1.92        |
| SSR1      | C9J3L8     | 43.52       | C20orf27    | Q9GZN8     | 2.48        | TFG       | Q92734     | 1.92        |
| CDK11A    | A0A0D9SEI3 | 33.31       | TOMM5       | F8W8Z9     | 2.48        | EIF2B4    | A0A087WTA5 | 1.92        |
| NIP7      | Q9Y221     | 33.00       | PCID2       | Q5JVF3     | 2.46        | MRPS5     | P82675     | 1.92        |
| CBX5      | P45973     | 20.89       | RCN1        | Q15293     | 2.46        | COA3      | Q9Y2R0     | 1.91        |
| SCAF11    | F8VXG7     | 20.70       | NDUFAF3     | Q9BU61     | 2.45        | SPRYD4    | Q8WW59     | 1.91        |
| SCML2     | Q9UQR0     | 14.81       | VPRBP       | Q9Y4B6     | 2.43        | EIF4G2    | P78344     | 1.90        |
| POLR2G    | P62487     | 14.44       | PSMF1       | Q5QPM7     | 2.43        | PRPF38B   | Q5VTL8     | 1.90        |
| RCOR1     | Q9UKL0     | 12.90       | SGPL1       | O95470     | 2.42        | LSM5      | B8ZZF8     | 1.89        |
| NUDT16L1  | Q9BRJ7     | 10.84       | RTN4        | F8W914     | 2.42        | IP09      | Q96P70     | 1.89        |
| UBXN7     | O94888     | 10.14       | RAD23B      | P54727     | 2.40        | NUP107    | P57740     | 1.89        |
| KIAA1429  | Q69YN4     | 9.82        | ARFIP2      | A0A087X1E4 | 2.40        | ROMO1     | P60602     | 1.88        |
| CSTB      | P04080     | 9.25        | AP2A1       | O95782     | 2.37        | SYMPK     | Q92797     | 1.88        |
| ANAPC5    | F5GY68     | 8.50        | WDR26       | Q9H7D7     | 2.33        | USMG5     | Q96IX5     | 1.87        |
| DCP1A     | Q9NP16     | 8.48        | NECAP2      | D6RB24     | 2.31        | RBFOX1    | A0A0G2JSB3 | 1.87        |
| BROX      | Q5VW32     | 6.82        | GFP         | CON_Q9U6Y5 | 2.30        | MRPL21    | Q7Z2W9     | 1.87        |
| DPM3      | Q9P2X0     | 6.35        | SEC63       | Q9UGP8     | 2.28        | DDX56     | Q9NY93     | 1.87        |
| CWC15     | Q9P013     | 6.13        | BPTF        | Q12830     | 2.28        | RPLP2     | P05387     | 1.86        |
| FAM98A    | Q8NCA5     | 6.03        | EIF4A2      | Q14240     | 2.27        | APMAP     | Q9HDC9     | 1.86        |
| AS3MT     | A0A087WVD4 | 5.48        | ATAD2       | Q6PL18     | 2.26        | EXOC5     | O00471     | 1.86        |
| FAM114A2  | Q9NRY5     | 5.34        | GLG1        | Q92896     | 2.26        | AKAP12    | Q02952     | 1.86        |
| GORASP2   | Q9H8Y8     | 5.25        | GTF3C3      | Q9Y5Q9     | 2.26        | IGF2BP3   | O00425     | 1.85        |
| TNKS1BP1  | Q9C0C2     | 4.81        | ARL8A:ARL8B | Q96BM9     | 2.23        | TIPRL     | O75663     | 1.85        |
| SF3B4     | Q15427     | 4.51        | AQR         | O60306     | 2.22        | CCDC51    | Q96ER9     | 1.85        |
| RSRC2     | Q7L412     | 4.16        | NT5C2       | P49902     | 2.21        | SAR1A     | Q9NR31     | 1.85        |
| CRK       | P46108     | 3.93        | ALDOC       | P09972     | 2.20        | CFDP1     | Q9UEE9     | 1.84        |
| RAB5A     | P20339     | 3.86        | CASP3       | P42574     | 2.18        | MOV10     | Q9HCE1     | 1.84        |
| AAAS      | Q9NRG9     | 3.73        | PSMA4       | P25789     | 2.18        | ATP5J     | P18859     | 1.84        |
| POLR2H    | C9JLU1     | 3.66        | SAAL1       | J3KND1     | 2.18        | RDH11     | Q8TC12     | 1.83        |
| NUP98     | P52948     | 3.62        | ERO1L       | Q96HE7     | 2.17        | ANKFY1    | Q9P2R3     | 1.82        |
| PPIL3     | B8ZZ77     | 3.59        | UBTF        | P17480     | 2.16        | KDM3B     | Q7LBC6     | 1.81        |
| AURKB     | Q96GD4     | 3.47        | PSMD8       | K7EJC1     | 2.16        | U2AF1     | P0DNT6     | 1.81        |
| SMARCE1   | A0A2R8Y855 | 3.44        | DYNLT1      | P63172     | 2.16        | ARFGAP1   | E5RHT6     | 1.81        |
| NLE1      | Q9NVX2     | 3.44        | HSP90AB4P   | Q58FF6     | 2.15        | SCRIB     | A0A0G2JNZ2 | 1.81        |
| CUL4B     | K4DI93     | 3.40        | MPC2        | Q5R3B4     | 2.15        | TRAF2     | Q12933     | 1.81        |
| RHOB      | P62745     | 3.35        | HMOX2       | A0A087WT44 | 2.15        | NUDT1     | Q9BRJ7     | 1.80        |
| DDX10     | Q13206     | 3.35        | ATXN10      | Q9UBB4     | 2.12        | ACP1      | P24666     | 1.80        |
| MARCKS    | P29966     | 3.35        | SNRNP27     | Q8WVK2     | 2.11        | NRG3      | Q9UGV2     | 1.80        |
| PRPF4B    | Q13523     | 3.34        | GNAI3       | P08754     | 2.09        | TFRC      | P02786     | 1.80        |
| PIIG      | Q13427     | 3.27        | EMG1        | Q92979     | 2.09        | BLOC1S1   | A0A087WSV2 | 1.80        |
| CAPN2     | P17655     | 3.24        | PIIH        | O43447     | 2.07        | NUDT21    | O43809     | 1.79        |
| BRD2      | P25440     | 3.21        | WDR12       | Q9GZL7     | 2.05        | MLLT11    | Q13015     | 1.79        |
| AGK       | E9PC15     | 3.20        | NDUFV2      | E7EPT4     | 2.05        | PCBP3     | E9PFP8     | 1.79        |
| RTN3      | B7Z4M1     | 3.19        | LSM14A      | Q8ND56     | 2.05        | GPATCH4   | Q5T310     | 1.79        |
| RNMT      | O43148     | 3.17        | C1QBP       | Q07021     | 2.02        | UBAP2L    | F8W726     | 1.78        |
| IKBKAP    | O95163     | 3.12        | BASP1       | P80723     | 2.02        | YTHDF2    | Q9Y5A9     | 1.78        |
| SNAPIN    | O95295     | 3.12        | MMTAG2      | Q9BU76     | 2.02        | PWP1      | Q13610     | 1.78        |
| ASAH1     | A0A1B0GV06 | 3.05        | NDUFB7      | P17568     | 2.01        | TNPO3     | C9J7E5     | 1.78        |
| MRPL52    | G3V3U6     | 3.05        | VPS29       | F8VXU5     | 2.01        | SURF6     | O75683     | 1.77        |
| PRC1      | O43663     | 3.03        | DHX8        | Q14562     | 2.01        | SCCPDH    | Q8NBX0     | 1.77        |
| FANCI     | Q9NV11     | 2.97        | SFXN4       | Q6P4A7     | 2.01        | ATF7IP    | Q6VMQ6     | 1.76        |
| SPC25     | Q9HBM1     | 2.92        | YBX3        | P16989     | 2.00        | COBP1     | P53618     | 1.75        |
| C6orf211  | Q9H993     | 2.90        | GNPDA1      | P46926     | 1.98        | STT3A     | P46977     | 1.75        |
| DPF2      | J3KMZ8     | 2.85        | M6PR        | P20645     | 1.97        | OSTC      | A0A087WUD3 | 1.74        |
| TMEM109   | Q9BVC6     | 2.80        | HEATR3      | Q7Z4Q2     | 1.97        | RFC5      | P40937     | 1.74        |

## B.

| Gene name              | Protein ID | Fold change | Gene name                | Protein ID | Fold change |
|------------------------|------------|-------------|--------------------------|------------|-------------|
| <a href="#">SACS</a>   | 438.15     | Q9NZJ4      | <a href="#">WDR48</a>    | 2.59       | Q8TAF3      |
| <a href="#">SUMO4</a>  | 346.72     | Q6EEV6      | <a href="#">CC2D1A</a>   | 2.58       | Q6P1N0      |
| <a href="#">TRPT1</a>  | 157.22     | Q86TN4      | <a href="#">NUF2</a>     | 2.43       | E9PQC4      |
| <a href="#">H2AFY2</a> | 74.11      | Q9P0M6      | <a href="#">SREK1IP1</a> | 2.20       | Q8N9Q2      |
| <a href="#">HIRIP3</a> | 67.50      | Q9BW71      | <a href="#">FDX1</a>     | 2.16       | P10109      |
| <a href="#">WDR76</a>  | 48.85      | A0A0C4DFX7  | <a href="#">HMGA1</a>    | 2.13       | P17096      |
| <a href="#">RPL3L</a>  | 41.37      | Q92901      | <a href="#">H3F3B</a>    | 2.12       | K7EK07      |
| <a href="#">KAT8</a>   | 34.85      | Q9H7Z6      | <a href="#">THYN1</a>    | 2.03       | Q9P016      |
| <a href="#">NIPBL</a>  | 29.11      | Q6KC79      | <a href="#">MAP1B</a>    | 1.97       | P46821      |
| <a href="#">FLOT1</a>  | 21.81      | O75955      | <a href="#">POLR2F</a>   | 1.94       | U3KPY1      |
| <a href="#">CENPK</a>  | 19.10      | D6RHD3      | <a href="#">DNAJB12</a>  | 1.91       | J3KPS0      |
| <a href="#">PPHLN1</a> | 16.40      | F8W0Q9      | <a href="#">LIG1</a>     | 1.91       | F5GZ28      |
| <a href="#">CHAMP1</a> | 5.29       | Q96JM3      | <a href="#">EIF2AK2</a>  | 1.86       | P19525      |
| <a href="#">MBD1</a>   | 5.24       | A0A0A0MS90  | <a href="#">GLDC</a>     | 1.84       | P23378      |
| <a href="#">MRPL57</a> | 4.29       | Q9BQC6      | <a href="#">TRAFD1</a>   | 1.81       | O14545      |
| <a href="#">PRPF31</a> | 4.25       | Q8WWY3      | <a href="#">RBM10</a>    | 1.78       | P98175      |
| <a href="#">QTRTD1</a> | 3.80       | Q9H974      | <a href="#">LSM3</a>     | 1.78       | P62310      |
| <a href="#">SRRM1</a>  | 3.40       | A9Z1X7      | <a href="#">IGF2BP2</a>  | 1.75       | F8W930      |
| <a href="#">RRP9</a>   | 2.99       | O43818      | <a href="#">TXNDC12</a>  | 1.75       | O95881      |
| <a href="#">DSG2</a>   | 2.68       | Q14126      |                          |            |             |

**Table S3: Proteins with significant and consistent changes in cells expressing Htt134Q, Htt134Qm, or Htt17Q**

| Protein ID | Protein name                                                                                                             | Protein expression level                                                                              | State                     |
|------------|--------------------------------------------------------------------------------------------------------------------------|-------------------------------------------------------------------------------------------------------|---------------------------|
| A0A2R8Y855 | SWI/SNF-related matrix-associated actin-dependent regulator of chromatin subfamily E member 1<br><a href="#">SMARCE1</a> | 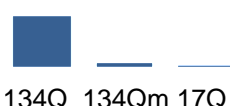<br>134Q 134Qm 17Q   | Up Regulated<br>Htt134Q   |
| P49593     | Protein phosphatase 1F<br><a href="#">PPM1F</a>                                                                          | <br>134Q 134Qm 17Q   |                           |
| Q9H4A6     | Golgi phosphoprotein 3<br><a href="#">GOLPH3</a>                                                                         | <br>134Q 134Qm 17Q   |                           |
| Q8TAF3     | WD repeat-containing protein 48<br><a href="#">WDR48</a>                                                                 | <br>134Q 134Qm 17Q   | Down Regulated<br>Htt134Q |
| P98175     | RNA-binding protein 10<br><a href="#">RBM10</a>                                                                          | <br>134Q 134Qm 17Q |                           |
| Q9H974     | Queuine tRNA-ribosyltransferase subunit QTRTD1<br><a href="#">QTRTD1</a>                                                 | <br>134Q 134Qm 17Q | Up regulated<br>134Qm     |
| Q9NZM5     | Glioma tumor suppressor candidate region gene 2 protein<br><a href="#">GLTSCR2</a>                                       | <br>134Q 134Qm 17Q |                           |
| J3QQW9     | Polycomb protein SUZ12<br><a href="#">SUZ12</a>                                                                          | <br>134Q 134Qm 17Q |                           |
| Q8TC07     | TBC1 domain family member 15<br><a href="#">TBC1D15</a>                                                                  | <br>134Q 134Qm 17Q |                           |
| E9PQC4     | Kinetochores protein Nuf2<br><a href="#">NUF2</a>                                                                        | <br>134Q 134Qm 17Q |                           |
| Q9BVC6     | Transmembrane protein 109<br><a href="#">TMEM109</a>                                                                     | <br>134Q 134Qm 17Q | Down Regulated<br>134Qm   |
| Q9NPI6     | mRNA-decapping enzyme 1A<br><a href="#">DCP1A</a>                                                                        | <br>134Q 134Qm 17Q |                           |
